# Supplementary material for: Probing the local structure of the near-infrared emitting persistent phosphor LiGa5O8:Cr3+
Source: Royal Society of Chemistry journal article supplement (doi:10.1039/c7tc02699d), 2017-01-01
Supplement: c7tc02699d1.pdf [file c7tc02699d1.pdf]

# Supporting info

## **Probing the local structure of the near-infrared emitting persistent phosphor $\text{LiGa}_5\text{O}_8\text{:Cr}^{3+}$**

Olivier Q. De Clercq <sup>a,b</sup>, Lisa I.D.J. Martin <sup>a,b</sup>, Katleen Korthout <sup>a,b</sup>, Henk Vrielinck <sup>c</sup>, Jevgenij Kusakovskij <sup>c</sup>, Dirk Poelman <sup>a,b,\*</sup>

<sup>a</sup> LumiLab, Department of Solid State Sciences, Ghent University, Ghent, Belgium

<sup>b</sup> Center for Nano- and Biophotonics (NB-Photonics), Ghent University, Ghent, Belgium

<sup>c</sup> EMR group, Department of Solid State Sciences, Ghent University, Ghent, Belgium

\* Corresponding author - [dirk.poelman@ugent.be](mailto:dirk.poelman@ugent.be)

## Results: XRD reference patterns

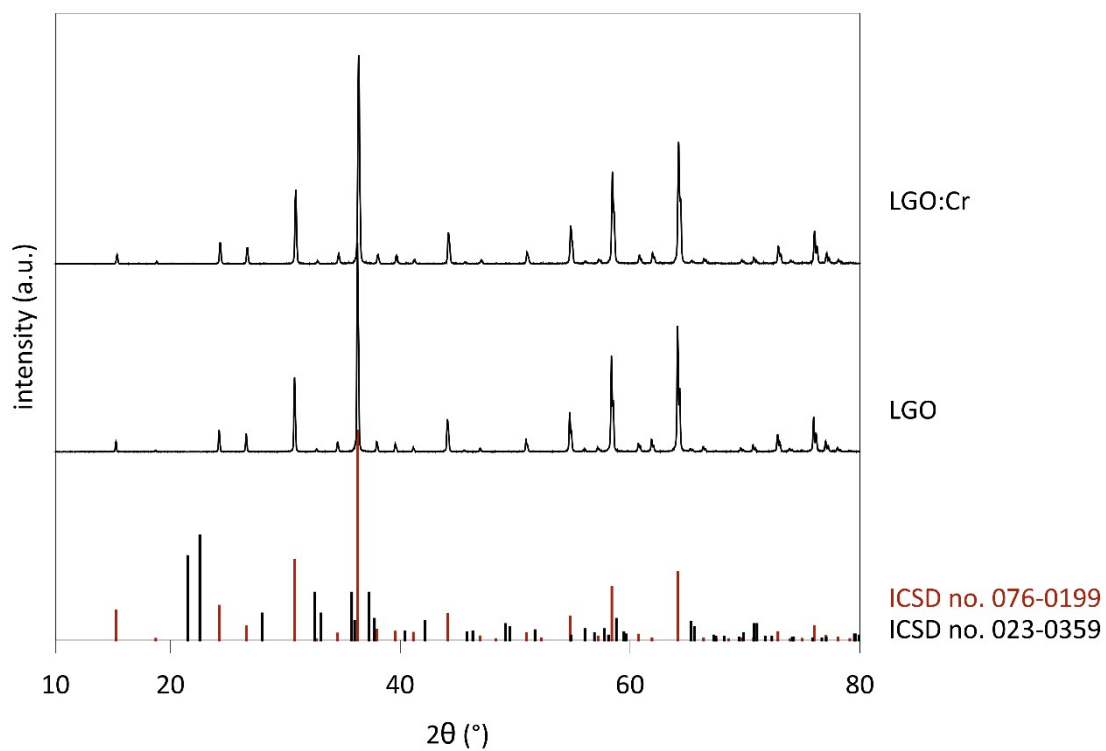

Figure S1: XRD patterns of LGO and LGO:Cr, compared with reference patterns for the  $P4_332$  space group of  $\text{LiGa}_5\text{O}_8$  (ICSD no. 076-0199, red) and the  $Pna2_1$  space group of  $\text{LiGaO}_2$  (ICSD no. 023-0359, black). No  $\text{LiGaO}_2$  phase can be detected in the samples.

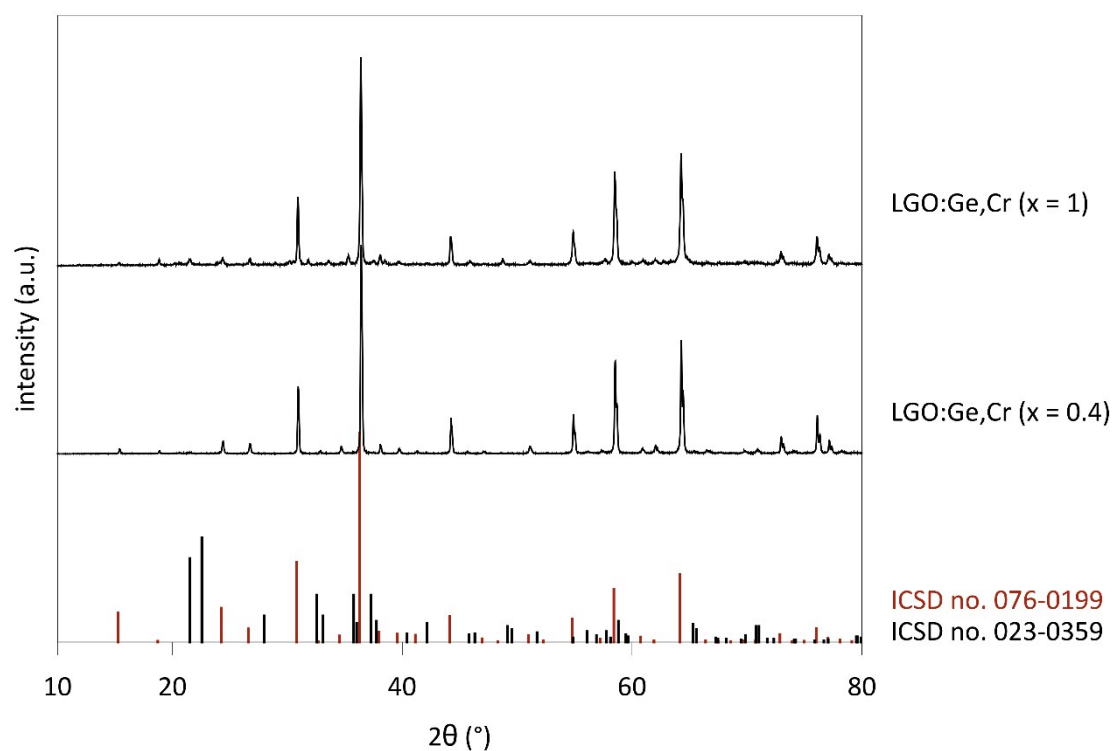

Figure S2: XRD patterns of LGO:Ge,Cr ( $x=0.4$ ,  $x=1$ ), compared with reference patterns for the  $P4_332$  space group of  $\text{LiGa}_5\text{O}_8$  (ICSD no. 076-0199, red) and the  $Pna2_1$  space group of  $\text{LiGaO}_2$  (ICSD no. 023-0359, black). No  $\text{LiGaO}_2$  phase can be detected. Small amounts of Ge-containing side phase are present in the  $x=1$  sample only.

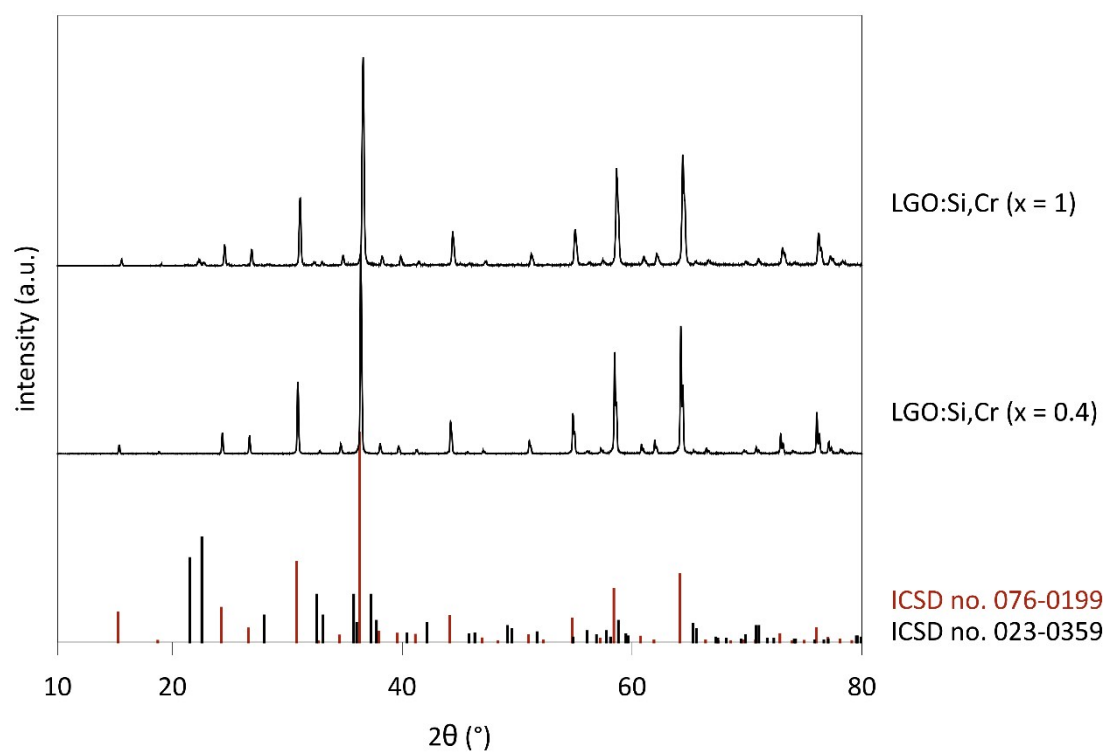

Figure S3: XRD patterns of LGO:Si,Cr ( $x=0.4$ ,  $x = 1$ ), compared with reference patterns for the  $P4_332$  space group of  $\text{LiGa}_5\text{O}_8$  (ICSD no. 076-0199, red) and the  $Pna2_1$  space group of  $\text{LiGaO}_2$  (ICSD no. 023-0359, black). No  $\text{LiGaO}_2$  phase can be detected. Small amounts of Si-containing side phase are present in the  $x = 1$  sample only.

## Results: SEM-EDX mappings

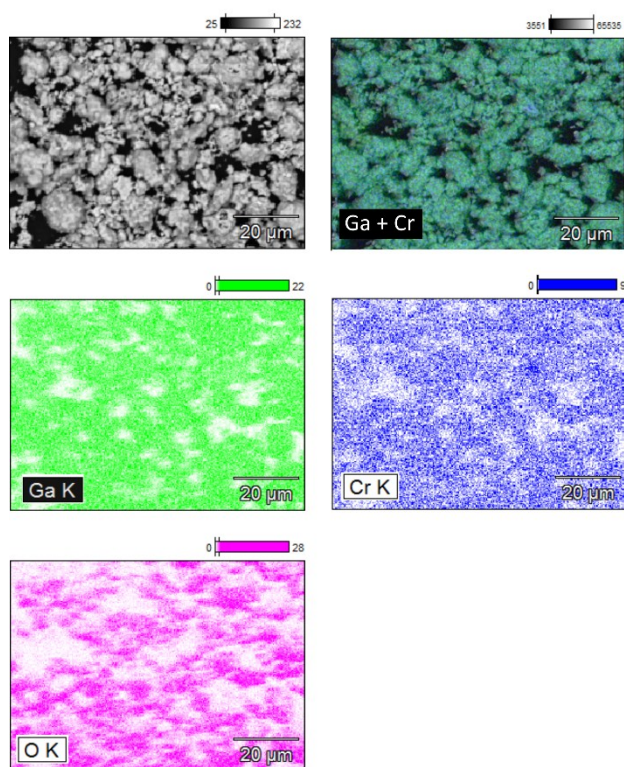

Figure S4: SEM image of LGO:Cr powder and EDX mappings of Ga (green), Cr (blue) and O (pink) signals and composite map of Ga and Cr.

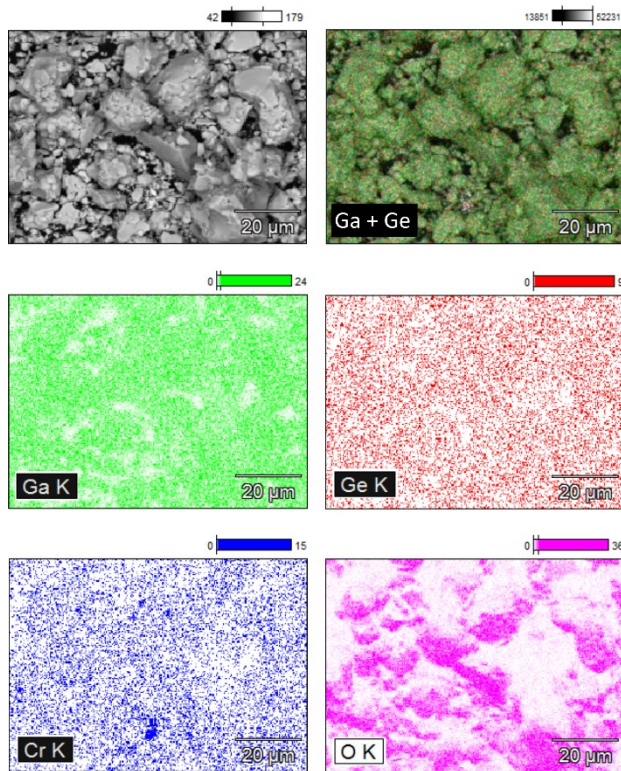

Figure S5: SEM image of LGO:Ge,Cr ( $x = 0.4$ ) powder and EDX mappings of Ga (green), Ge (red), Cr (blue) and O (pink) signals and composite map of Ga and Ge.

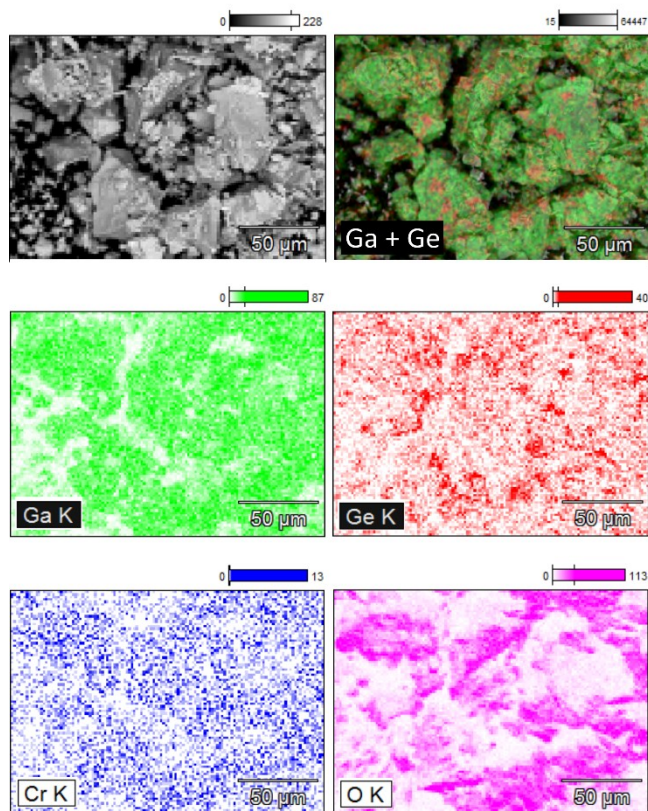

Figure S6: SEM image of LGO:Ge,Cr ( $x = 1$ ) powder and EDX mappings of Ga (green), Ge (red), Cr (blue) and O (pink) signals and composite map of Ga and Ge. Clustering of Ge is evident from this composite map.



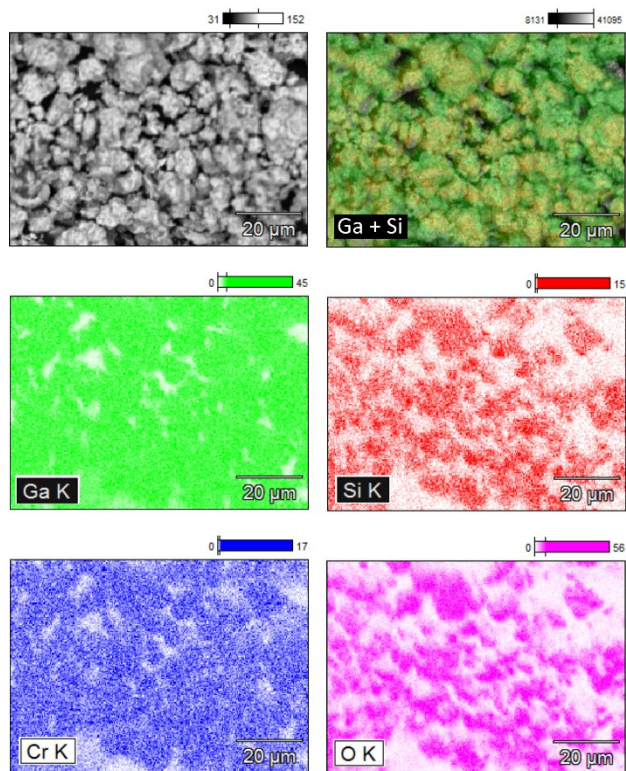

Figure S7: SEM image of LGO:Si,Cr ( $x = 0.4$ ) powder and EDX mappings of Ga (green), Si (red), Cr (blue) and O (pink) signals and composite map of Ga and Ge.



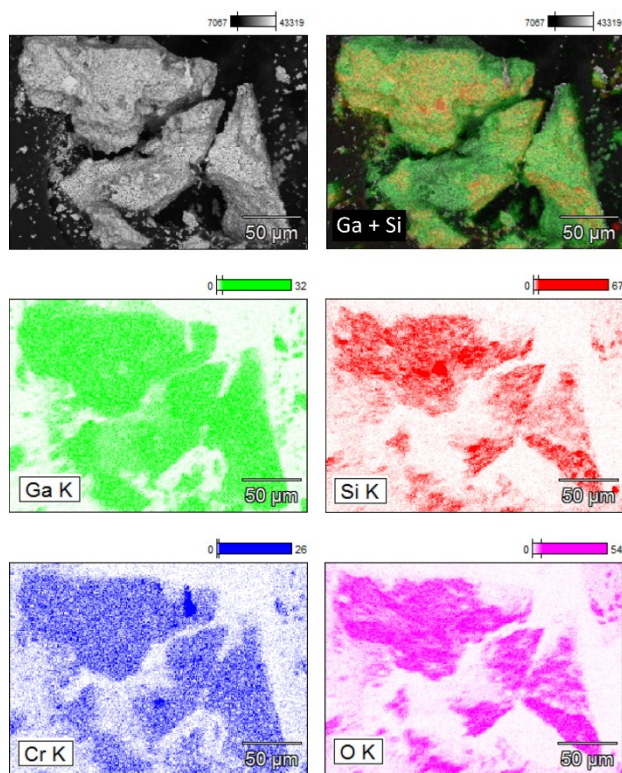

Figure S8: SEM image of LGO:Si,Cr ( $x = 1$ ) powder and EDX mappings of Ga (green), Si (red), Cr (blue) and O (pink) signals and composite map of Ga and Ge. Clustering of Si is evident from this composite map.

## NOTE

All SEM images and EDX mappings were taken at a low oxygen pressure of 20 Pa. This results in larger oxygen signals than expected from stoichiometry.

## Results: Diffuse reflectance measurements

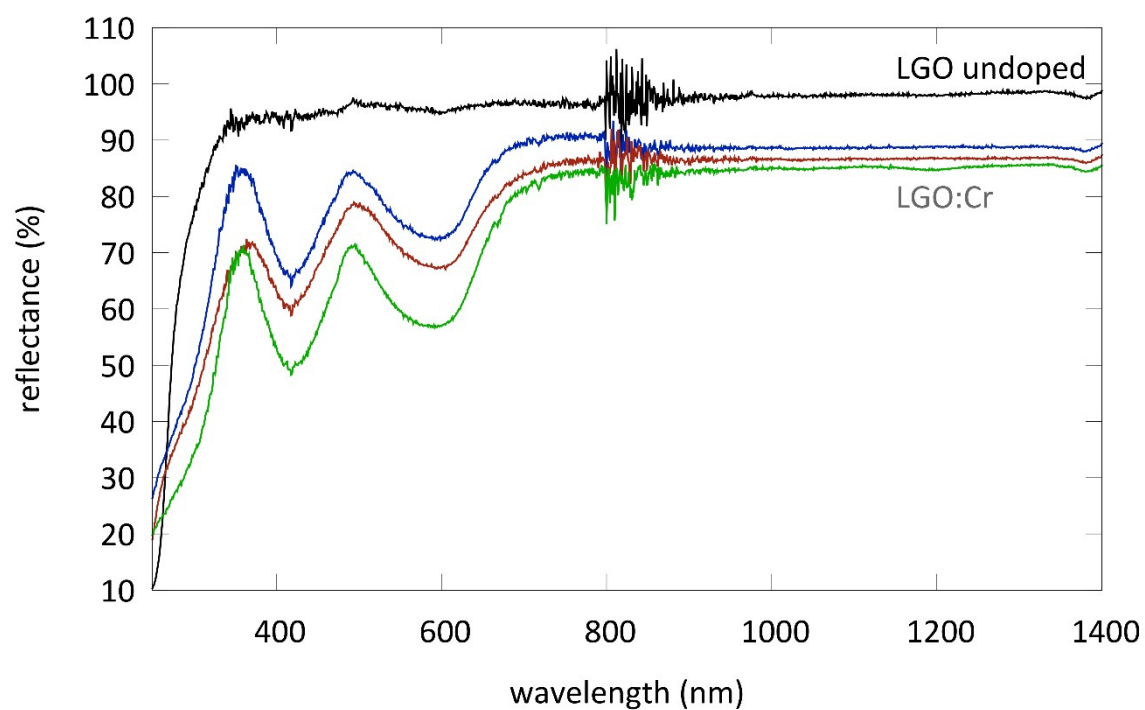

Figure S9: Diffuse reflectance spectra of undoped LGO and selected LGO:Cr samples. The optical transitions of  $\text{Cr}^{3+}$  are visible below 300 nm, and at 410 and 600 nm. The noise between 800 and 900 nm is due to the changing of detectors in the spectrometer.

## Results: Radioluminescence

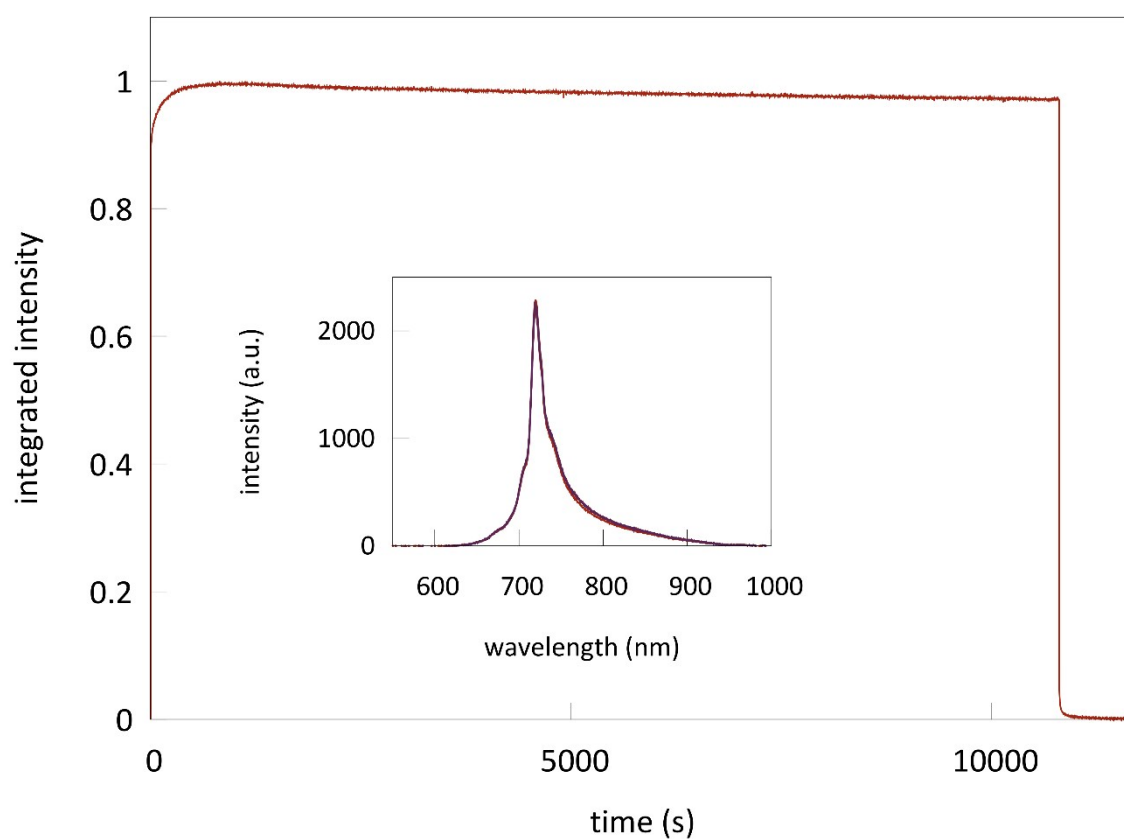

Figure S10: Integrated emission intensity as a function of time, during X-Ray irradiation of LGO:Cr. The emission intensity does only decrease 2 % over the course of 3 h. Inset: emission spectrum of LGO:Cr, when excited via full spectrum Cu-anode X-rays.
